# Supplementary material
Source: Springer Nature journal article supplement (https://www.springermedizin.de/resource/supplementary/12957_2014_1795_MOESM2_ESM.pdf/9563572)

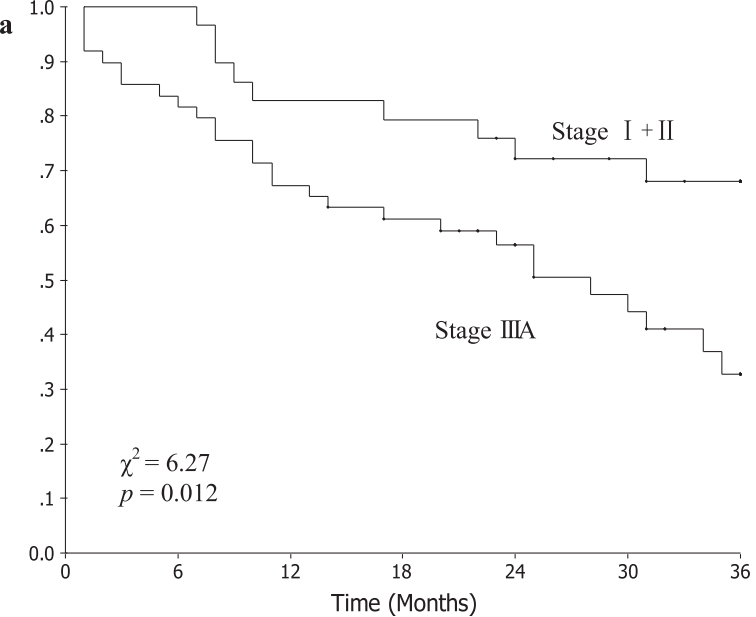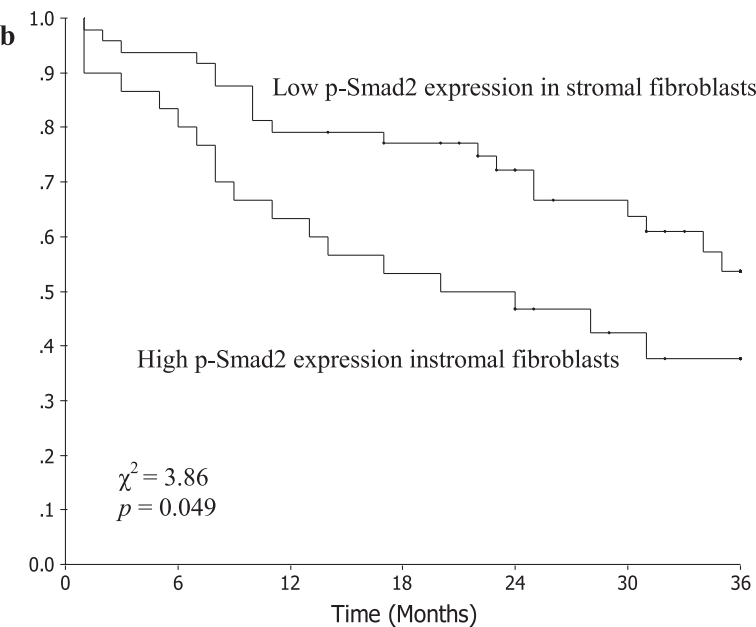

Supplement: MOESM2 [file 9563572]
